# Supplementary material for: Implementing an evolutionary framework for understanding genetic relationships of phenotypically defined insect biotypes in the invasive soybean aphid (Aphis glycines)
Source: PubMed Central journal article supplement (PMC3804237; doi:10.1111/eva.12084), 2013-07-24
Supplement: eva0006-1041-SD1.pdf [file eva0006-1041-SD1.pdf]

## **Supplemental Information**

Table S1: Polymorphism statistics of loci per population, and HWE significance.

Figure S1: LOSITAN output from the complete loci dataset with clones removed. Locus 42701 exhibits significant directional selection. 5109 and 2654 show significant balancing selection.

Figure S2: Hypothetical PCA indicative of: A) Predicted pattern of biotypic clustering associated with restricted gene flow of race formation and speciation. B) Predicted null pattern of isolation by distance predicted in systems with limited gene flow, but limited selection.

1 **Supplemental Materials**

2 Table S1: Polymorphism Statistics of loci per population, and HWE significance.

|              | <b>Df-B1</b>         |                      |                       |            | <b>Df-B2</b>         |                      |                       |            |
|--------------|----------------------|----------------------|-----------------------|------------|----------------------|----------------------|-----------------------|------------|
| <b>Locus</b> | <b>H<sub>O</sub></b> | <b>H<sub>E</sub></b> | <b>F<sub>IS</sub></b> | <b>HWE</b> | <b>H<sub>O</sub></b> | <b>H<sub>E</sub></b> | <b>F<sub>IS</sub></b> | <b>HWE</b> |
| <b>20935</b> | 0.302                | 0.447                | 0.324                 | *          | 0.103                | 0.490                | 0.789                 | ***        |
| <b>13475</b> | 0.395                | 0.369                | -0.071                | ns         | 0.621                | 0.499                | -0.243                | ns         |
| <b>3383</b>  | 0.651                | 0.439                | -0.483                | **         | 0.448                | 0.383                | -0.169                | ns         |
| <b>7006</b>  | 0.535                | 0.392                | -0.365                | *          | 0.483                | 0.366                | -0.318                | ns         |
| <b>4773</b>  | 0.488                | 0.496                | 0.015                 | ns         | 0.214                | 0.375                | 0.429                 | *          |
| <b>2836</b>  | 0.143                | 0.245                | 0.417                 | **         | 0.138                | 0.428                | 0.678                 | ***        |
| <b>47077</b> | 0.907                | 0.496                | -0.830                | ***        | 0.690                | 0.452                | -0.526                | **         |
| <b>11160</b> | 0.500                | 0.466                | -0.074                | ns         | 0.607                | 0.499                | -0.216                | ns         |
| <b>934</b>   | 0.721                | 0.496                | -0.454                | **         | 0.345                | 0.366                | 0.058                 | ns         |
| <b>25779</b> | 0.000                | 0.499                | 1.000                 | ***        | 0.000                | 0.245                | 1.000                 | ***        |
| <b>26668</b> | 0.535                | 0.412                | -0.297                | ns         | 0.690                | 0.471                | -0.465                | *          |
| <b>1708</b>  | 0.349                | 0.412                | 0.154                 | ns         | 0.655                | 0.498                | -0.317                | ns         |
| <b>37780</b> | 0.581                | 0.473                | -0.229                | ns         | 0.414                | 0.452                | 0.084                 | ns         |
| <b>8466</b>  | 0.907                | 0.500                | -0.814                | ***        | 0.897                | 0.499                | -0.795                | ***        |
| <b>2816</b>  | 0.302                | 0.317                | 0.047                 | ns         | 0.250                | 0.219                | -0.143                | ns         |
|              | <b>Wd-B1</b>         |                      |                       |            | <b>Wd-B2</b>         |                      |                       |            |
| <b>20935</b> | 0.262                | 0.466                | 0.438                 | **         | 0.176                | 0.472                | 0.626                 | ***        |
| <b>13475</b> | 0.595                | 0.436                | -0.365                | *          | 0.412                | 0.472                | 0.128                 | ns         |
| <b>3383</b>  | 0.595                | 0.436                | -0.365                | *          | 0.529                | 0.457                | -0.159                | ns         |
| <b>7006</b>  | 0.524                | 0.387                | -0.355                | *          | 0.529                | 0.389                | -0.360                | *          |
| <b>4773</b>  | 0.195                | 0.476                | 0.590                 | ***        | 0.294                | 0.498                | 0.410                 | *          |
| <b>2836</b>  | 0.220                | 0.457                | 0.520                 | ***        | 0.118                | 0.498                | 0.764                 | ***        |
| <b>47077</b> | 0.929                | 0.497                | -0.867                | ***        | 0.824                | 0.484                | -0.700                | ***        |
| <b>11160</b> | 0.690                | 0.500                | -0.382                | *          | 0.618                | 0.500                | -0.236                | ns         |
| <b>934</b>   | 0.452                | 0.452                | -0.001                | ns         | 0.529                | 0.500                | -0.059                | ns         |
| <b>25779</b> | 0.024                | 0.486                | 0.951                 | ***        | 0.029                | 0.465                | 0.937                 | ***        |
| <b>26668</b> | 0.452                | 0.477                | 0.052                 | ns         | 0.353                | 0.360                | 0.019                 | ns         |
| <b>1708</b>  | 0.571                | 0.427                | -0.337                | *          | 0.441                | 0.489                | 0.098                 | ns         |
| <b>37780</b> | 0.524                | 0.427                | -0.225                | ns         | 0.647                | 0.457                | -0.417                | *          |
| <b>8466</b>  | 0.643                | 0.452                | -0.422                | **         | 0.853                | 0.496                | -0.719                | ***        |
| <b>2816</b>  | 0.286                | 0.337                | 0.152                 | ns         | 0.235                | 0.291                | 0.190                 | ns         |
|              | <b>Fu-B1</b>         |                      |                       |            | <b>Fu-B2</b>         |                      |                       |            |
| <b>20935</b> | 0.474                | 0.488                | 0.028                 | ns         | 0.607                | 0.448                | -0.354                | **         |
| <b>13475</b> | 0.553                | 0.472                | -0.171                | ns         | 0.179                | 0.392                | 0.545                 | ***        |
| <b>3383</b>  | 0.632                | 0.478                | -0.322                | *          | 0.446                | 0.500                | 0.107                 | ns         |
| <b>7006</b>  | 0.342                | 0.284                | -0.206                | ns         | 0.375                | 0.305                | -0.231                | ns         |
| <b>4773</b>  | 0.395                | 0.441                | 0.106                 | ns         | 0.536                | 0.490                | -0.094                | ns         |
| <b>2836</b>  | 0.526                | 0.478                | -0.101                | ns         | 0.661                | 0.492                | -0.342                | *          |
| <b>47077</b> | 0.703                | 0.456                | -0.542                | ***        | 0.839                | 0.487                | -0.723                | ***        |
| <b>11160</b> | 0.289                | 0.375                | 0.228                 | ns         | 0.375                | 0.416                | 0.098                 | ns         |

|              |       |       |        |     |              |       |        |     |
|--------------|-------|-------|--------|-----|--------------|-------|--------|-----|
| <b>934</b>   | 0.500 | 0.441 | -0.133 | ns  | 0.464        | 0.494 | 0.061  | ns  |
| <b>25779</b> | 0.026 | 0.458 | 0.943  | *** | 0.036        | 0.436 | 0.918  | *** |
| <b>26668</b> | 0.447 | 0.458 | 0.023  | ns  | 0.429        | 0.448 | 0.044  | ns  |
| <b>1708</b>  | 0.632 | 0.450 | -0.403 | *   | 0.536        | 0.490 | -0.094 | ns  |
| <b>37780</b> | 0.526 | 0.411 | -0.279 | ns  | 0.607        | 0.459 | -0.322 | *   |
| <b>8466</b>  | 0.605 | 0.441 | -0.371 | *   | 0.893        | 0.494 | -0.806 | *** |
| <b>2816</b>  | 0.289 | 0.317 | 0.086  | ns  | 0.339        | 0.347 | 0.022  | ns  |
| <b>W1-B1</b> |       |       |        |     | <b>W1-B2</b> |       |        |     |
| <b>20935</b> | 0.452 | 0.452 | -0.001 | ns  | 0.457        | 0.415 | -0.101 | ns  |
| <b>13475</b> | 0.535 | 0.431 | -0.242 | ns  | 0.413        | 0.447 | 0.076  | ns  |
| <b>3383</b>  | 0.442 | 0.431 | -0.026 | ns  | 0.478        | 0.423 | -0.129 | ns  |
| <b>7006</b>  | 0.395 | 0.344 | -0.148 | ns  | 0.435        | 0.340 | -0.278 | ns  |
| <b>4773</b>  | 0.442 | 0.447 | 0.011  | ns  | 0.370        | 0.415 | 0.109  | ns  |
| <b>2836</b>  | 0.571 | 0.500 | -0.143 | ns  | 0.630        | 0.494 | -0.276 | ns  |
| <b>47077</b> | 0.767 | 0.473 | -0.623 | *** | 0.652        | 0.440 | -0.484 | **  |
| <b>11160</b> | 0.349 | 0.473 | 0.262  | ns  | 0.391        | 0.440 | 0.110  | ns  |
| <b>934</b>   | 0.548 | 0.497 | -0.101 | ns  | 0.565        | 0.485 | -0.166 | ns  |
| <b>25779</b> | 0.073 | 0.489 | 0.850  | *** | 0.065        | 0.494 | 0.868  | *** |
| <b>26668</b> | 0.442 | 0.483 | 0.085  | ns  | 0.587        | 0.471 | -0.245 | ns  |
| <b>1708</b>  | 0.419 | 0.422 | 0.008  | ns  | 0.413        | 0.447 | 0.076  | ns  |
| <b>37780</b> | 0.395 | 0.392 | -0.009 | ns  | 0.500        | 0.415 | -0.206 | ns  |
| <b>8466</b>  | 0.837 | 0.487 | -0.720 | *** | 0.609        | 0.466 | -0.306 | *   |
| <b>2816</b>  | 0.302 | 0.344 | 0.122  | ns  | 0.239        | 0.375 | 0.362  | *   |
| <b>W2-B1</b> |       |       |        |     | <b>W2-B2</b> |       |        |     |
| <b>20935</b> | 0.477 | 0.442 | -0.080 | ns  | 0.404        | 0.477 | 0.153  | ns  |
| <b>13475</b> | 0.500 | 0.499 | -0.002 | ns  | 0.447        | 0.467 | 0.044  | ns  |
| <b>3383</b>  | 0.409 | 0.416 | 0.017  | ns  | 0.489        | 0.409 | -0.195 | ns  |
| <b>7006</b>  | 0.432 | 0.339 | -0.275 | ns  | 0.426        | 0.335 | -0.270 | ns  |
| <b>4773</b>  | 0.500 | 0.474 | -0.054 | ns  | 0.383        | 0.435 | 0.119  | ns  |
| <b>2836</b>  | 0.500 | 0.500 | -0.001 | ns  | 0.326        | 0.481 | 0.322  | *   |
| <b>47077</b> | 0.619 | 0.427 | -0.448 | **  | 0.702        | 0.456 | -0.541 | *** |
| <b>11160</b> | 0.455 | 0.474 | 0.041  | ns  | 0.565        | 0.454 | -0.246 | ns  |
| <b>934</b>   | 0.409 | 0.474 | 0.137  | ns  | 0.468        | 0.500 | 0.063  | ns  |
| <b>25779</b> | 0.045 | 0.416 | 0.891  | *** | 0.064        | 0.496 | 0.871  | *** |
| <b>26668</b> | 0.545 | 0.483 | -0.128 | ns  | 0.404        | 0.427 | 0.053  | ns  |
| <b>1708</b>  | 0.477 | 0.500 | 0.045  | ns  | 0.447        | 0.456 | 0.019  | ns  |
| <b>37780</b> | 0.455 | 0.416 | -0.092 | ns  | 0.511        | 0.400 | -0.276 | ns  |
| <b>8466</b>  | 0.864 | 0.491 | -0.760 | *** | 0.809        | 0.489 | -0.654 | *** |
| <b>2816</b>  | 0.386 | 0.339 | -0.141 | ns  | 0.255        | 0.282 | 0.096  | ns  |
| <b>W3-B1</b> |       |       |        |     | <b>W3-B2</b> |       |        |     |
| <b>20935</b> | 0.511 | 0.452 | -0.132 | ns  | 0.465        | 0.467 | 0.005  | ns  |
| <b>13475</b> | 0.356 | 0.429 | 0.171  | ns  | 0.419        | 0.467 | 0.104  | ns  |
| <b>3383</b>  | 0.578 | 0.444 | -0.300 | *   | 0.395        | 0.490 | 0.194  | ns  |
| <b>7006</b>  | 0.400 | 0.320 | -0.250 | ns  | 0.395        | 0.317 | -0.246 | ns  |
| <b>4773</b>  | 0.167 | 0.486 | 0.657  | *** | 0.162        | 0.470 | 0.655  | *** |

|              |              |       |        |     |              |       |        |     |
|--------------|--------------|-------|--------|-----|--------------|-------|--------|-----|
| <b>2836</b>  | 0.182        | 0.491 | 0.629  | *** | 0.175        | 0.475 | 0.631  | *** |
| <b>47077</b> | 0.689        | 0.452 | -0.525 | *** | 0.698        | 0.454 | -0.536 | *** |
| <b>11160</b> | 0.378        | 0.464 | 0.187  | ns  | 0.548        | 0.497 | -0.101 | ns  |
| <b>934</b>   | 0.667        | 0.498 | -0.339 | *   | 0.605        | 0.498 | -0.215 | ns  |
| <b>25779</b> | 0.089        | 0.494 | 0.820  | *** | 0.047        | 0.478 | 0.903  | *** |
| <b>26668</b> | 0.556        | 0.437 | -0.272 | ns  | 0.535        | 0.412 | -0.297 | ns  |
| <b>1708</b>  | 0.422        | 0.401 | -0.052 | ns  | 0.535        | 0.461 | -0.160 | ns  |
| <b>37780</b> | 0.622        | 0.458 | -0.358 | *   | 0.535        | 0.490 | -0.091 | ns  |
| <b>8466</b>  | 0.844        | 0.488 | -0.731 | *** | 0.930        | 0.498 | -0.870 | *** |
| <b>2816</b>  | 0.289        | 0.333 | 0.133  | ns  | 0.512        | 0.381 | -0.344 | *   |
|              | <b>W4-B1</b> |       |        |     | <b>W4-B2</b> |       |        |     |
| <b>20935</b> | 0.370        | 0.352 | -0.049 | ns  | 0.304        | 0.315 | 0.033  | ns  |
| <b>13475</b> | 0.435        | 0.440 | 0.011  | ns  | 0.217        | 0.405 | 0.464  | **  |
| <b>3383</b>  | 0.378        | 0.491 | 0.231  | ns  | 0.511        | 0.437 | -0.170 | ns  |
| <b>7006</b>  | 0.364        | 0.298 | -0.222 | ns  | 0.391        | 0.315 | -0.243 | ns  |
| <b>4773</b>  | 0.130        | 0.496 | 0.737  | *** | 0.200        | 0.484 | 0.587  | *** |
| <b>2836</b>  | 0.419        | 0.487 | 0.140  | ns  | 0.364        | 0.463 | 0.214  | ns  |
| <b>47077</b> | 0.667        | 0.444 | -0.500 | *** | 0.689        | 0.452 | -0.525 | *** |
| <b>11160</b> | 0.489        | 0.444 | -0.100 | ns  | 0.432        | 0.479 | 0.099  | ns  |
| <b>934</b>   | 0.326        | 0.460 | 0.291  | *   | 0.370        | 0.481 | 0.231  | ns  |
| <b>25779</b> | 0.022        | 0.396 | 0.945  | *** | 0.087        | 0.499 | 0.826  | *** |
| <b>26668</b> | 0.587        | 0.471 | -0.245 | ns  | 0.674        | 0.460 | -0.465 | **  |
| <b>1708</b>  | 0.609        | 0.485 | -0.255 | ns  | 0.370        | 0.447 | 0.173  | ns  |
| <b>37780</b> | 0.565        | 0.476 | -0.187 | ns  | 0.457        | 0.447 | -0.022 | ns  |
| <b>8466</b>  | 0.848        | 0.488 | -0.736 | *** | 0.935        | 0.498 | -0.878 | *** |
| <b>2816</b>  | 0.391        | 0.315 | -0.243 | ns  | 0.543        | 0.396 | -0.373 | *   |

3 H<sub>O</sub>: Observed Heterozygosity, H<sub>E</sub>: Expected Heterozygosity, F<sub>IS</sub>: Inbreeding Coefficient = (H<sub>E</sub>-  
4 H<sub>O</sub>)/H<sub>E</sub>, HWE: Significance test for deviation from Hardy-Weinberg Equilibrium ns=Non-  
5 Significant Deviation, asterisks denote significant deviation with \* (p<0.05), \*\* (p<0.01), \*\*\*  
6 (p<0.001). Significance determined via GenAlEx 2.0.  
7 Table S2: Pairwise population comparison F<sub>st</sub> values. All significant F<sub>st</sub> scores in bold (p<0.05).

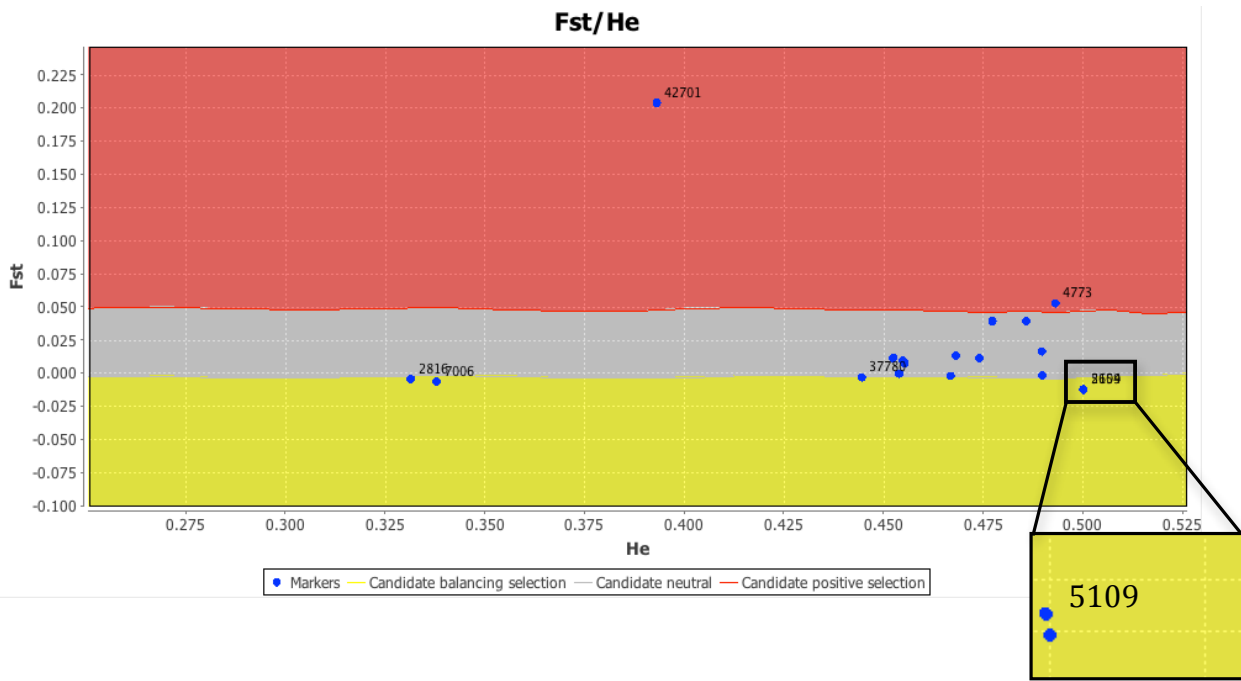

1 Figure S1: LOSITAN output from the complete loci dataset with clones removed. Locus 42701  
 2 exhibits significant directional selection. 5109 and 2654 show significant balancing selection.  
 3

A.

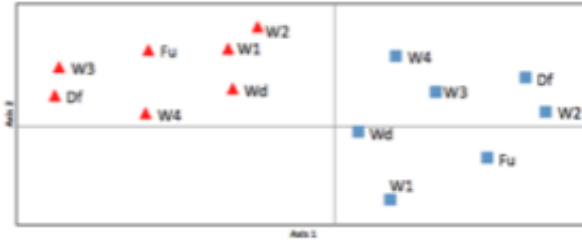

B.

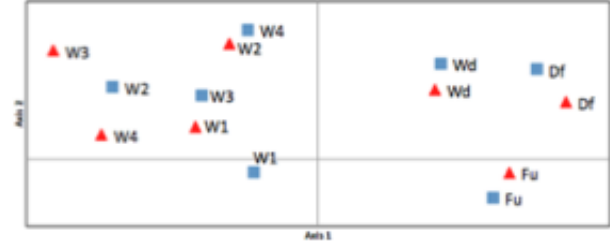

3

4 Figure S2: Hypothetical Principal Component Analyses indicative of: A) Predicted pattern of  
5 biotypic clustering associated with restricted gene flow of race formation and speciation. B)  
6 Predicted null pattern of isolation by distance predicted in systems with limited gene flow, but  
7 limited selection.

8
